# Supplementary material
Source: PubMed Central journal article supplement (PMC2683101)
Supplement: 0812877106_0812877106SI.pdf [file 0812877106_0812877106SI.pdf]

# Supporting Information

Léonard et al. 10.1073/pnas.0812877106

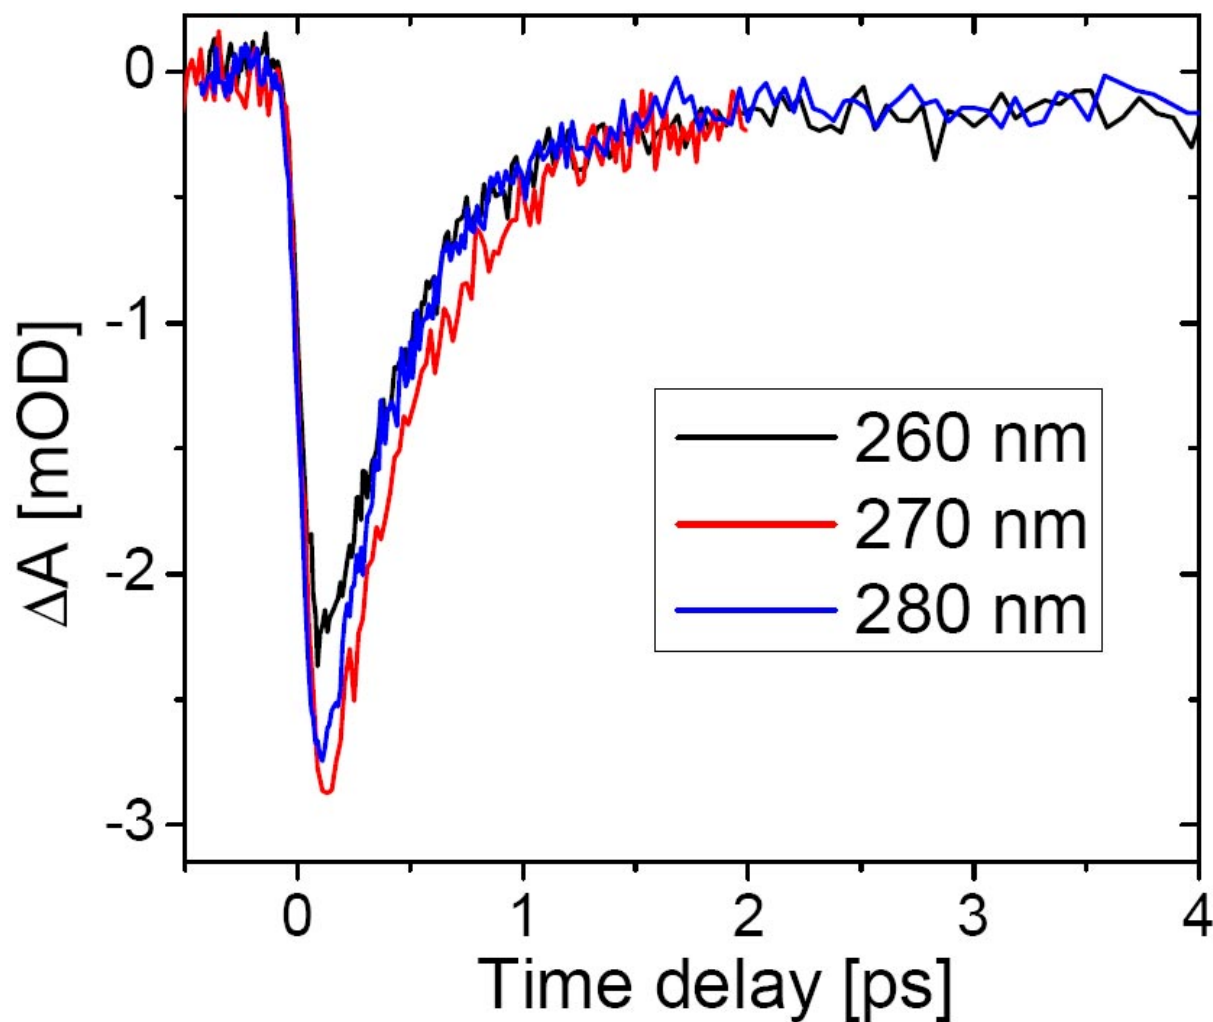

**Fig. S1.** Transient signal of the W86F mutant at 260 nm, 270 nm, and 280 nm. Like for the WT bR (1), the signal is almost wavelength independent in that range of wavelengths.

1. Schenkl S, et al. (2006) Insights into excited-state and isomerization dynamics of bacteriorhodopsin from ultrafast transient uv absorption. *Proc Natl Acad Sci USA* 103:4101–4106.
